# Supplementary material for: Cd1d-dependent regulation of bacterial colonization in the intestine of mice
Source: JCI journal article supplement (doi:10.1172/jci36509), 2009-04-16
Supplement: sd1 [file 1]

#### Supplementary Figure s1

Oral treatment of mice with vancomycin is associated with overgrowth of bacteria within the ileum with vancomycin resistant gram-negative bacteria. Treatment was applied to mice at 3-weeks after colonization with (vancomycin resistant ) *P. aeruginosa*. *Cd1d*<sup>-/-</sup> mice exhibited a significantly increased rate of small intestinal overgrowth with *P. aeruginosa*. (data are mean  $\pm$  s.e.m.; probabilities were calculated by Student's t-tests; n=5 for each group, \* P < 0.05)

#### Supplementary Figure s2

(A): Analysis of fixed intestinal tissues from germ-free (n=5; 80 crypts/mouse) and SPF mice (n=5; 80 crypts/mouse) stained with haematoxylin and eosin did not reveal any significant differences in either the number of Pc or the quantity of granules per Pc when WT mice and *Cd1d*<sup>-/-</sup> animals were compared. (B): Equal expression of lysozyme-p relative to tubulin in crypt fraction obtained from WT and *Cd1d*<sup>-/-</sup> mice as determined by qPCR. (C): Equal expression and distribution of CDX2 as determined by immunohistochemistry on intestinal tissue derived from WT and *Cd1d*<sup>-/-</sup> mice in SPF conditions.

#### Supplementary Figure s3

SPF *Cd1d*<sup>-/-</sup> display equal expression and distribution of lysozyme immunoreactivity along the crypt axis 24 hours after intraperitoneal injection with 2  $\mu$ g of  $\alpha$ GalCer (KRN7000) or PBS.

#### Supplementary Figure s4

Pc of *Cd1d*<sup>-/-</sup> mice exhibit predominantly smaller granules, whereas granules of larger size are nearly completely absent in comparison to WT mice at t=3 (A) and t=96 (B) hours upon colonization with *E. coli* under germ free conditions and in SPF (C) conditions (diameter in  $\mu$ m; \*P<0.05; \*\*P<0.005; \*\*\*P<0.0005).

Figure s1

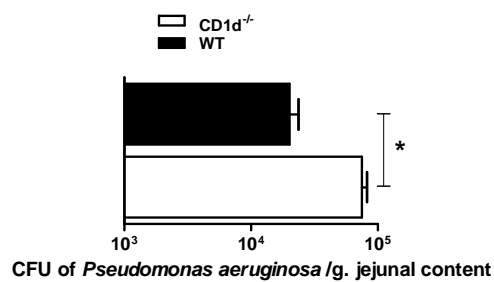

Figure s2

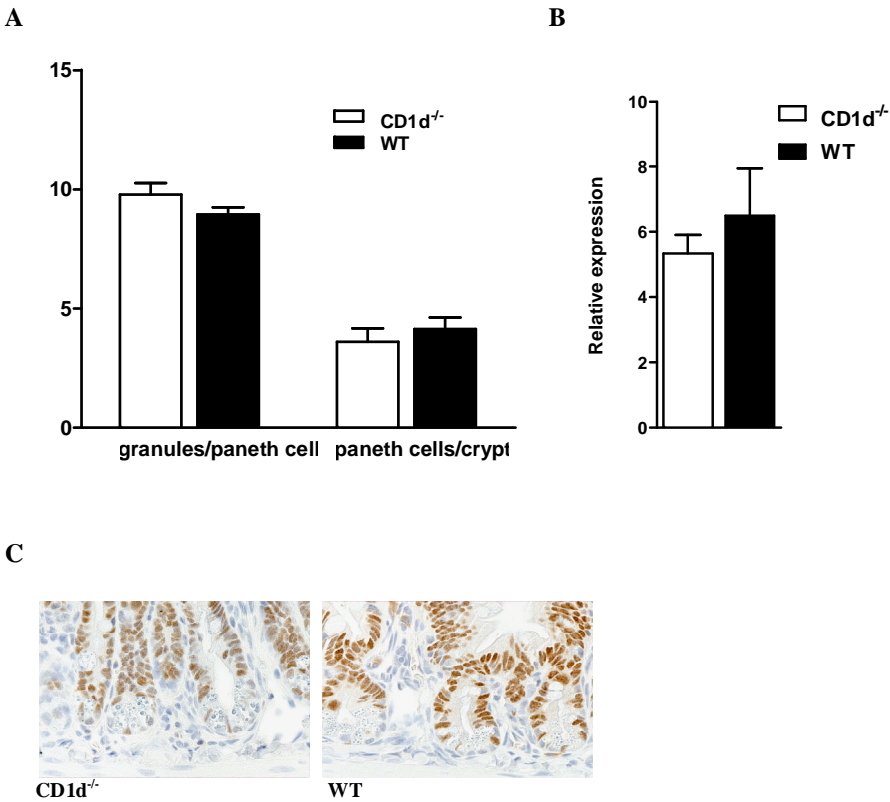

Figure s3

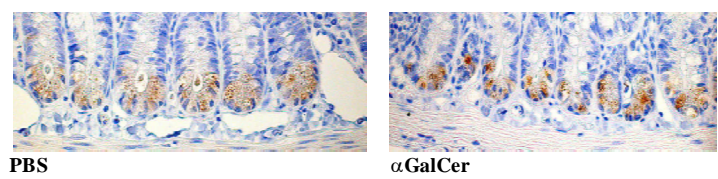

Figure s4

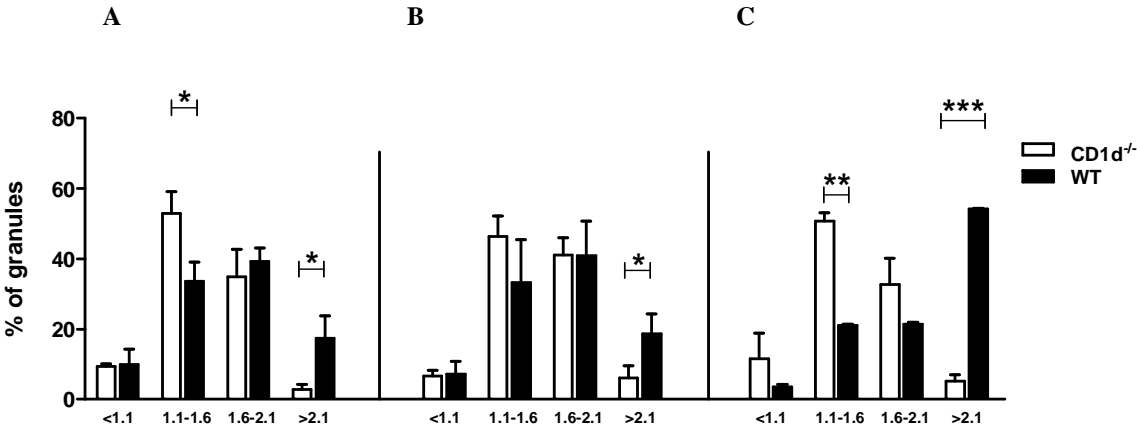

Supplementary Table s1

| –                           | KO1 | KO2 | KO3 | KO4 | KO5 | WT1 | WT2 | WT3 | WT4 | WT5 |
|-----------------------------|-----|-----|-----|-----|-----|-----|-----|-----|-----|-----|
| Clones                      | 77  | 67  | 90  | 93  | 90  | 75  | 63  | 82  | 84  | 90  |
| 99% OTUs                    | 29  | 24  | 38  | 45  | 46  | 31  | 24  | 33  | 43  | 28  |
| Bacteroidetes (%)           | 4   | 22  | 6   | 3   | 2   | 0   | 0   | 0   | 0   | 0   |
| Deferribacteres (%)         | 0   | 0   | 0   | 0   | 0   | 3   | 3   | 1   | 5   | 0   |
| Firmicutes (Bacilli) (%)    | 12  | 49  | 22  | 18  | 12  | 43  | 52  | 40  | 26  | 53  |
| Firmicutes (Clostridia) (%) | 82  | 27  | 72  | 79  | 86  | 55  | 44  | 59  | 69  | 47  |
| unclassified bacteria (%)   | 3   | 2   | 0   | 0   | 0   | 0   | 0   | 0   | 0   | 0   |

Supplementary Table s1:

Microbial diversity in fecal samples of 5 *Cdld*<sup>-/-</sup> (KO) and 5 WT mice. A total of 811 bacterial near-full-length 16S rDNA sequences were subjected to phylogenetic analysis. In comparison to WT mice, *Cdld*<sup>-/-</sup> mice display clear shifts in the distribution of phyla that colonize the murine intestine.
